# Supplementary material for: Optimized Cesarean Techniques, IVF Utilization, and Foster Strain Selection Enhance Germ-Free Mouse Production Efficiency
Source: Research Square preprint supplement (doi:10.21203/rs.3.rs-5554864/v1), 2025-04-28
Supplement: Supplementary file 1 [file e85befc18a5a30656adf4243.docx]

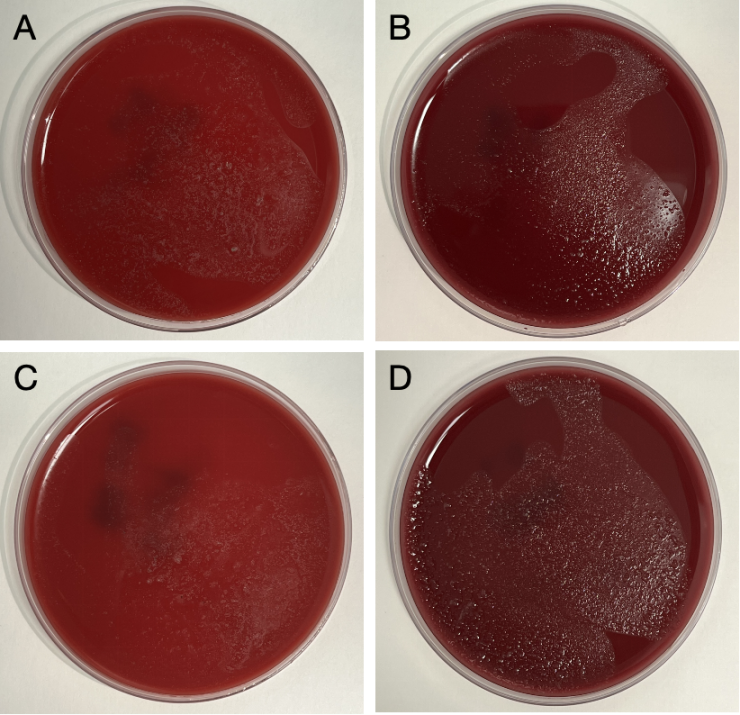


Figure 1: The culturing of fecal sample from germ-free mice after FRT-CS and T-CS. (A) Fecal of GF weanling pups obtained from FRT-CS was cultured in a Columbia blood agar plate under aerobic conditions for 48h. (B) Fecal of GF weanling pups obtained from FRT-CS was cultured in a Columbia blood agar plate under anaerobic conditions for 48h. (C) Fecal of GF weanling pups obtained from T-CS was cultured in a Columbia blood agar plate under aerobic conditions for 48h. (D) Fecal of GF weanling pups obtained from T-CS was cultured in a Columbia blood agar plate under anaerobic conditions for 48h.

| Mode of fertilization | Number of female mice | Form of copulatory plug  (G0.5) | | | | EDD | ADD | | | |
| --- | --- | --- | --- | --- | --- | --- | --- | --- | --- | --- |
|  |  | 0-24h | 24-48h | 48-72h | NA |  | G18 | G19 | G19.5 | NA |
| NM | 30 | 5 | 7 | 11 | 7 | G19.5 | 5 | 6 | 12 | 7 |
| IVF | 30 | / | | | | E19.5 | 0 | 2 | 28 | 0 |

Table 1: Predication of actual delivery date (ADD) for different fertilization models. NA for not available.


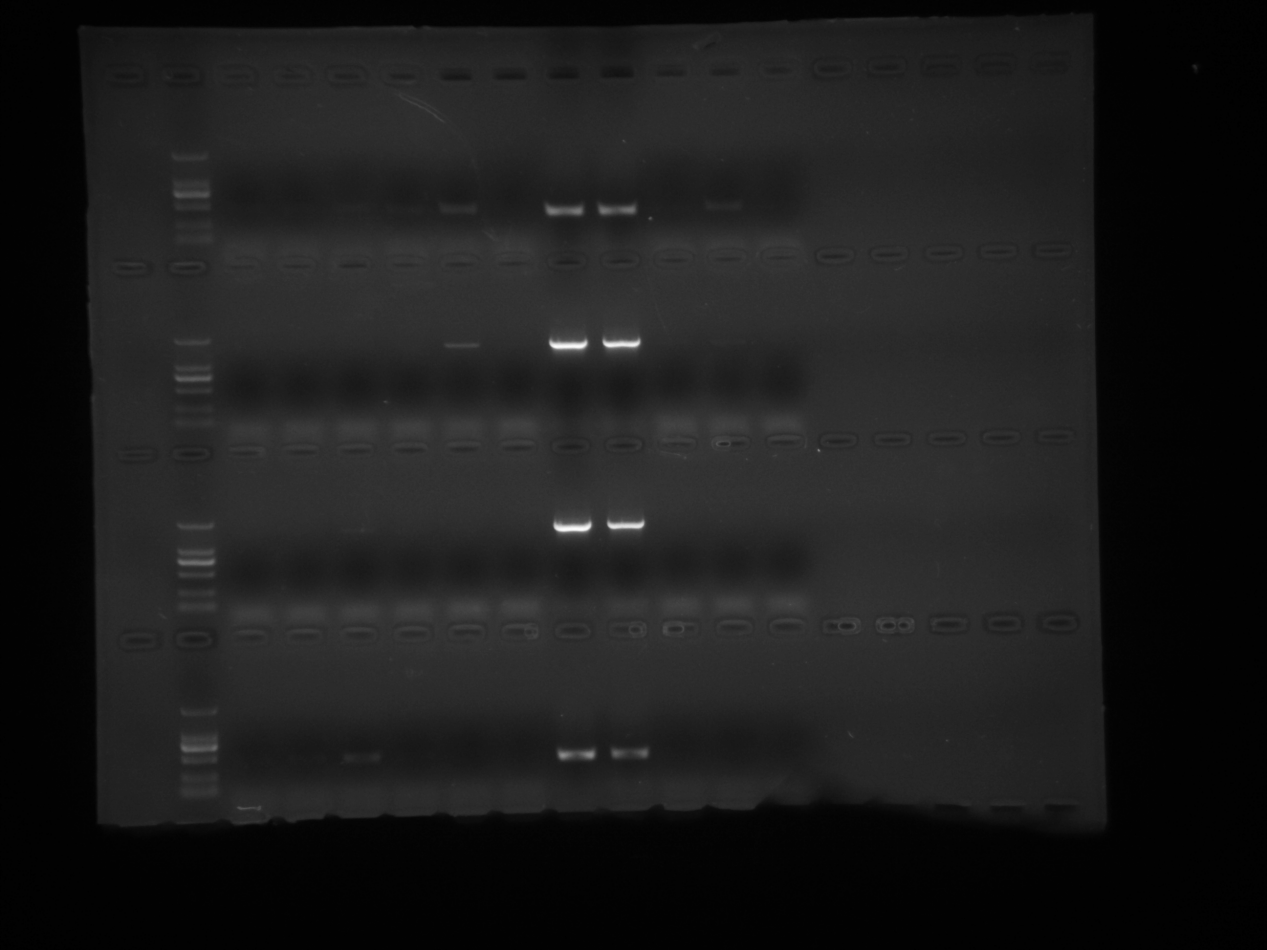


Figure 2：The complete membrane image depicting the detection of bacterial contamination following T-CS is presented in Figure 4 of the manuscript.


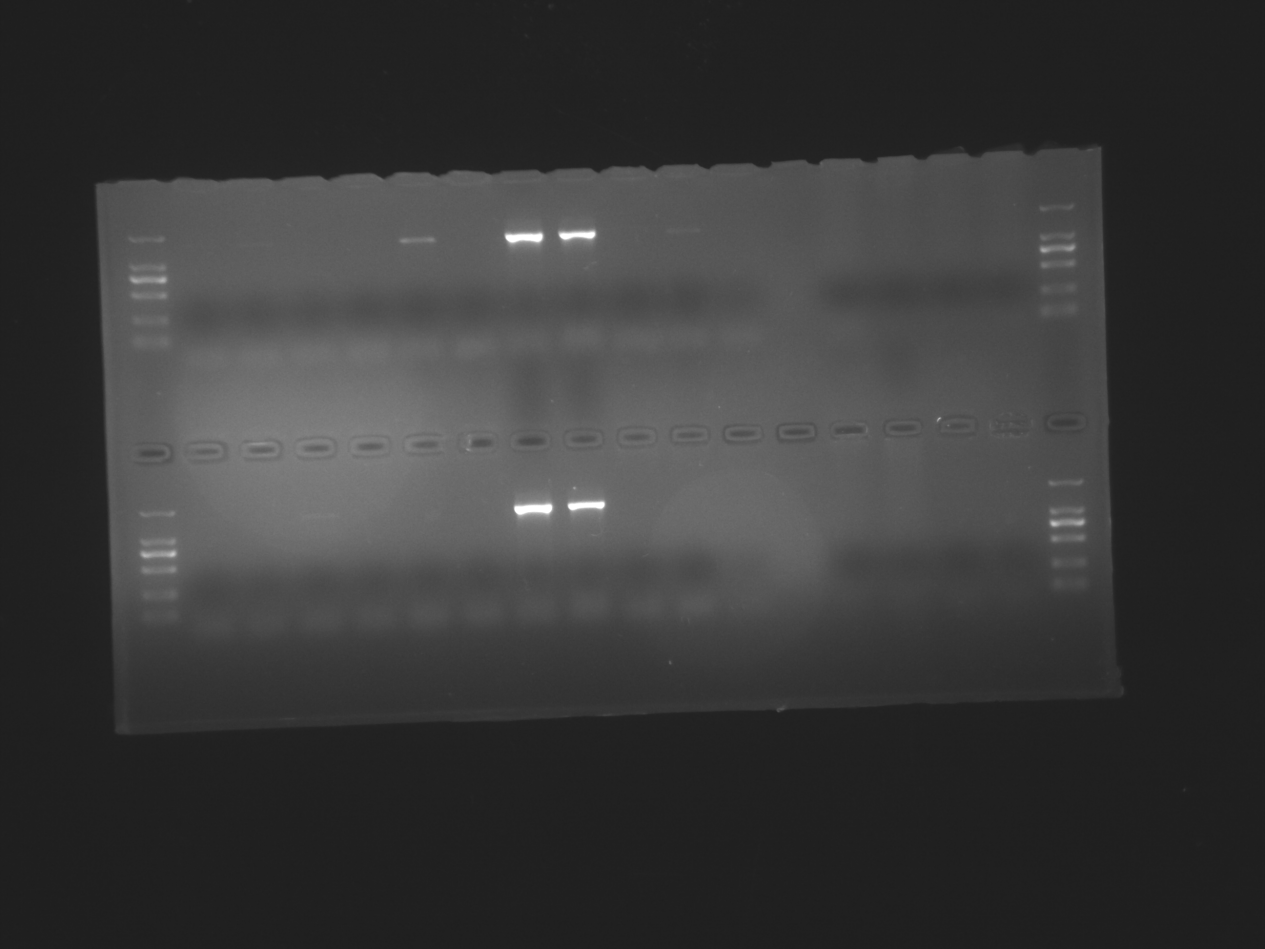


Figure 3：The complete membrane image depicting the detection of bacterial contamination following FRT-CS is presented in Figure 5 of the manuscript.
